# Supplementary material for: Identification of Genes Related to Immune Infiltration in the Tumor Microenvironment of Cutaneous Melanoma
Source: Front Oncol. 2021 May 28;11:615963. doi: 10.3389/fonc.2021.615963 (PMC8202075; doi:10.3389/fonc.2021.615963)
Supplement: Supplementary file 4 [file DataSheet_4.xls]

id	HR	HR.95L	HR.95H	pvalue
GZMB	0.735586970877144	0.647624254992472	0.835497107393703	2.29126654955036e-06
BTK	0.636227080662929	0.498007919689075	0.812808154580343	0.000296402544814298
CD200R1	0.389407367089805	0.211582476936352	0.716685520178637	0.00244333908828529
SELL	0.773705546502701	0.668873568205609	0.894967750474825	0.000552810900011385
P2RX1	0.415075793061928	0.249713541652342	0.689942214771245	0.000695085262128913
COL4A3	0.15364273957187	0.0385734377916032	0.611977899161691	0.00789904580993971
TREML1	0.273258739041353	0.107025811796158	0.697685326645198	0.00667406436759954
PLEK	0.74390739538112	0.65209924975278	0.848641082032411	1.0724725104193e-05
ARHGDIG	1.32113438241813	0.865578467730388	2.0164504103064	0.196756924567068
TBC1D10C	0.644456625885352	0.522890905217138	0.794284885247837	3.797943982251e-05
ALOX5AP	0.722892801931016	0.61591284586066	0.848454463315251	7.15343905119085e-05
IL2RA	0.565321336307445	0.437518956712281	0.730455694276582	1.28836133554088e-05
HAVCR2	0.684304547909955	0.574068002516283	0.815709484307942	2.30780255081562e-05
GABRB3	1.17611936680588	0.891668814935053	1.5513122605691	0.250839132194752
WAS	0.725673806285329	0.623865571430267	0.844096063710255	3.21747252132832e-05
TRAT1	0.51973841720971	0.364018454407917	0.742072329170845	0.000316084184877846
BCL11B	0.668784375431151	0.489947149183429	0.912899567976426	0.0112778130061843
CCND2	0.701909465862133	0.573835588646711	0.858568042858331	0.000574255322966666
SYK	0.799985989106906	0.667278797309103	0.959085745490724	0.0158931382450118
TOX	0.677322384459131	0.523848684076938	0.875759787958204	0.00295947352354331
ETV7	0.677897423052776	0.557829867778131	0.823808373710768	9.28245202892979e-05
ICAM3	0.529985824343723	0.38126537316475	0.736717766089715	0.000157920973108774
ARHGAP25	0.625441547874193	0.503342878809859	0.777158367139701	2.28448015607853e-05
SLA2	0.573685355661771	0.451354508425903	0.729171596066603	5.59410538064814e-06
DTX1	0.955921868108286	0.764587623970051	1.19513655371883	0.69239920488369
LY86	0.755755041195867	0.631220690530537	0.904858935807231	0.00230216216631873
CD74	0.805859722274187	0.73543057854164	0.883033573708087	3.73080058475363e-06
CLEC10A	0.667559694374433	0.547774006902175	0.813539780891559	6.19903693934522e-05
PPP1R16B	0.774399824308611	0.628095599529423	0.954783138647216	0.0167082824748567
P2RY8	0.661716331603893	0.529020949506713	0.82769596160531	0.000299128737069387
C3	0.845970620220558	0.761476897805175	0.939839793353073	0.00183535203962778
MAN1A1	0.720812888651491	0.589200351606389	0.881824355721368	0.00145983960304877
RASGRP1	0.532620308984976	0.393678034766027	0.720600004295013	4.41538757165752e-05
XCL1	0.421950729702405	0.275941366899524	0.645218295092454	6.83163065559878e-05
CCR5	0.661899565740843	0.551900306004957	0.793822779877172	8.58903792020006e-06
CD14	0.779463638859161	0.692552628579722	0.877281435707706	3.6186378929566e-05
HLA-DMA	0.731055534430696	0.64389970538582	0.830008446892387	1.32075779278824e-06
APBB1IP	0.655546485167417	0.545203497833707	0.788221638200917	7.10182330515719e-06
RARRES1	0.7525487223326	0.634136265556299	0.893072372997961	0.00113543737384849
IL32	0.768429276096457	0.672352074147538	0.878235637349356	0.000110974836382341
HLA-DOA	0.751873243614225	0.660882337795048	0.855391863473115	1.46908628237967e-05
IL18BP	0.598881875957013	0.490295021273038	0.73151773072984	5.09116477153511e-07
KLRC1	0.175351091622036	0.0665860648022886	0.461778382974553	0.000425154371047637
PLAU	0.903563754600358	0.775980417210592	1.05212379142543	0.191644844220647
CD52	0.816485936939553	0.734081008043138	0.908141305817415	0.000187671156026827
CXCL9	0.829887717276312	0.765083080833453	0.900181484258977	6.95939136951533e-06
WNT10A	0.941243051647535	0.598559344536344	1.48011803735356	0.79318112712974
SIGLEC8	0.824435397276377	0.618173288066533	1.09951972594633	0.188795017119994
NR1H3	0.542993695855577	0.416441523320966	0.70800373456432	6.46770851811669e-06
LMO3	1.21323452141305	0.827120404206726	1.7795933898645	0.322713676360419
RAB37	0.554245075276113	0.389225649052148	0.789227545039478	0.00106588279295623
CCL5	0.807009834309792	0.734905079098068	0.886189102777736	7.11695678695445e-06
TLL1	0.429704671787731	0.150073263187528	1.23037309267722	0.115555689322498
SAMD3	0.12453310985412	0.0429534113036237	0.361053871607864	0.000125191481686974
TACR1	0.451523687230027	0.130809173388508	1.55855766723857	0.208421032378605
CYSLTR1	0.262010176283854	0.124832803568709	0.549930230786743	0.000399031988187043
FASLG	0.582543571241962	0.442204101131131	0.7674216759349	0.000121874915166663
FOLR2	0.813554506373846	0.700310455362758	0.94511074306087	0.00697259009624158
CD1E	0.588118356492456	0.359969165738841	0.96086896924479	0.0340622467362619
TSPAN32	0.424254171320101	0.257001899570593	0.700351251034492	0.00080039564518185
FCER2	0.859905409054157	0.700804492191347	1.05512638797227	0.148203389350273
APOL3	0.67217994552985	0.571633428968455	0.79041192532749	1.5470546686141e-06
AIF1	0.73511871305702	0.644395220856893	0.83861503747344	4.67513973646754e-06
GNLY	0.639492681535373	0.517569527581003	0.790137108049311	3.43593818365281e-05
GIMAP7	0.683551411603646	0.582985175909737	0.801465545974157	2.79071900794466e-06
RSPO4	1.15690744447354	0.954026525249558	1.40293251776012	0.1384577589451
GIMAP5	0.31214066639352	0.17069085526271	0.570808526717112	0.000156431111709141
CR2	0.895517475149277	0.769366250569399	1.04235342751806	0.154300704762017
CCL2	0.783043025453327	0.680173118885611	0.90147105595071	0.000665390932437007
LAIR2	0.471705560984742	0.270211218122137	0.823452622767706	0.00821021719704438
GPR84	0.5276775394316	0.384224043596318	0.724690685711309	7.8387441108061e-05
CSF1R	0.722634844354995	0.623142969049006	0.838011731196955	1.72124180407499e-05
LAMP3	0.639399111036185	0.495209170241178	0.825572803901739	0.000603442168851636
DHRS9	0.761843383406197	0.50662050090764	1.1456412438896	0.191287725661997
UBD	0.780118570026178	0.697124393952711	0.872993383360175	1.51352018776715e-05
SIRPB2	0.399850900157783	0.242789676719124	0.658515405257325	0.000316745443273746
MS4A6A	0.687393431895329	0.578259269637203	0.817124350655526	2.14154674758699e-05
CDX1	0.734014081878146	0.288031861468087	1.87054539608672	0.517055680926962
PLA2G7	0.824029858583325	0.705220811715506	0.962854749259414	0.0148314097991517
MEI1	0.482439119693943	0.321685233924741	0.723525607226094	0.000423472646026163
ARHGDIB	0.731081653095956	0.638636269668679	0.836908908682562	5.59455895725321e-06
IL18RAP	0.167916732730269	0.0780480224785868	0.361265131842953	5.00454164623232e-06
SERPING1	0.705313437434303	0.615230165196553	0.808586888561391	5.51524527463458e-07
UCP2	0.760995204223437	0.658399229732997	0.879578338944779	0.000218528666347704
SHD	0.643634450090397	0.336589788040349	1.23077205566768	0.182800623286895
GZMA	0.757845531534284	0.673621238452041	0.852600566731346	3.97133073940373e-06
FCRL3	0.593340232025389	0.436515024583843	0.806507476519456	0.000858867801671554
IL18	0.661693047568046	0.53993308267528	0.810911024437462	6.88940652214891e-05
C1S	0.818710021750249	0.727461770822837	0.921403882098338	0.000907763030937182
LST1	0.642606353689368	0.533858135518771	0.773506851966716	2.94063444844845e-06
CARD11	0.662052174544632	0.528882491778579	0.828753246009853	0.000319148085130909
CD3E	0.771431782226907	0.683232566937655	0.871016727579506	2.79925706617048e-05
IGSF6	0.687423023720498	0.567684039627461	0.832418001131651	0.000123855829591404
GPR65	0.481463360219121	0.3467688241588	0.668476953762523	1.26915399129138e-05
RBP5	0.796861828675845	0.664528252796855	0.955548197278417	0.0142578441932317
TMSB4X	0.737909341052639	0.643983388669928	0.845534535816773	1.21217535032315e-05
IL2RG	0.756441916533204	0.66979264103332	0.854300776141197	6.89464385589337e-06
VMO1	0.696988336535195	0.56055452800717	0.866628877288962	0.00116276618561966
ASCL2	0.502572791464097	0.337155006090346	0.749149222634803	0.000730188292136188
ADAM8	0.761388502995474	0.621252025120045	0.933135714739395	0.00861925659684255
CCL21	0.987923473748126	0.926136014074576	1.05383310350781	0.712334365854723
NLRP3	0.489471341980529	0.292776229775274	0.818311632758287	0.00643655103782714
SYTL1	0.765159049586968	0.580564810467591	1.00844619000123	0.0573997191429576
TGM2	0.825691198477636	0.705026707834785	0.967007274571502	0.0174931112263995
VSIG4	0.771190682850232	0.670764560383257	0.886652492456059	0.00026225242578441
MFAP4	0.962070920538839	0.853116577168681	1.08494018392921	0.528339709101922
IRF1	0.713820585480524	0.616075844162329	0.827073213605013	7.22618353611714e-06
TCEAL7	1.05788419909275	0.751675258343659	1.48883306490108	0.746888594393113
EVI2B	0.738999452237159	0.640022841166161	0.853282344442202	3.74567150850266e-05
GBP5	0.724608182987815	0.631207829066522	0.831829065918585	4.75880393951827e-06
HK3	0.599837178363554	0.480586711520588	0.748677880436435	6.20096351845422e-06
GPR34	0.728697919135828	0.573283489272654	0.926244462450132	0.00971041294028543
KLRB1	0.584481297303069	0.438812796801181	0.778505981109435	0.000240742876894576
HLA-DRA	0.842600266244055	0.777329829864303	0.913351297477533	3.13845141681444e-05
LAX1	0.549097923889258	0.410865215609595	0.733838053367816	5.0909574198778e-05
PILRA	0.594515044762788	0.475378358637097	0.743509106015323	5.17848855905902e-06
CD274	0.547143239276395	0.414383089791928	0.722437115945502	2.1108463906357e-05
SLAMF1	0.699477846095356	0.572387285869565	0.854787080804747	0.000476537499008086
LYZ	0.858472115183216	0.784880223618595	0.938964125187681	0.000846185414510543
POU2AF1	0.712660525367086	0.585389800318362	0.867601424111387	0.000738381016108159
CD69	0.589864292364881	0.454417879463093	0.765682643953672	7.31350851665579e-05
IKZF3	0.682816381810693	0.566069262129151	0.823641632678285	6.6639206583114e-05
FGFR3	1.1877164174038	0.979902415686409	1.4396028273717	0.0795889621718309
LY9	0.468964079613182	0.294949447590887	0.745644074819532	0.00137190526654743
NETO1	1.18890927462635	0.497830737786065	2.8393290249185	0.696844345771609
PLAC8	0.663196707603732	0.494215764691589	0.889955166142669	0.00620183442315584
SLAMF8	0.73994456000111	0.640538212315539	0.854777968508646	4.28135282941993e-05
TLR8	0.545816079127351	0.400253736511756	0.744315830328806	0.000130337660208818
LGALS9	0.676391215047333	0.570679304504411	0.801685065819082	6.50699876542032e-06
SIDT1	0.515949722341422	0.312252434978758	0.852528551145805	0.00980457575562932
CSF3R	0.540349264153899	0.378503498849764	0.771399282064633	0.000701595725040269
TNFAIP8L2	0.662265361811164	0.545505500926506	0.804016474095945	3.12314748687212e-05
CD247	0.63373377555183	0.515505393722926	0.779077199124398	1.49346854178718e-05
SERPINA1	0.762301496030112	0.663984925744661	0.875175848605355	0.000116930451102004
TLR4	0.711377345222119	0.56692868451039	0.892630309811031	0.00327373813836209
SFRP4	0.94053985405937	0.833833512925556	1.06090149095866	0.318404896922519
CD40	0.613139597339596	0.507166816475073	0.741255448135652	4.35873830725998e-07
SIGLEC5	0.158100567939802	0.0391012745722654	0.639257667590647	0.00966218530670345
SAMSN1	0.583886665036509	0.476023283311403	0.716191097283853	2.42618640537447e-07
FLT3	0.304199946178056	0.133879116892708	0.69120270138092	0.00448436762787879
ATP8B4	0.266556854406933	0.122837434249837	0.578427553988196	0.000823042161181093
NKG7	0.799990810492106	0.72582647957745	0.881733189514376	6.9366584965358e-06
VPREB3	0.88396428152098	0.750617096697415	1.04100060396026	0.139317394566398
PECAM1	0.788730432551506	0.651467995502481	0.954913671166701	0.0149788673606617
LILRB5	0.690298562547264	0.505884079621473	0.941939319006379	0.0194316499002691
SIGLEC7	0.572265705729962	0.415835302113608	0.787542655205211	0.0006126296477441
SLAMF6	0.685004154041863	0.575363358852725	0.815538014082535	2.12593947657246e-05
CST7	0.782332075920505	0.69603585475351	0.879327512848935	3.84736782815352e-05
GZMH	0.697402551794501	0.599733531813736	0.810977364861662	2.84562672552269e-06
CCL24	0.788845842497383	0.589012632672043	1.05647609016883	0.11152897351007
GRAP	0.644279955060611	0.378089055920225	1.09788065534615	0.10596887757897
MARCO	0.770214692036763	0.678307994704558	0.874574200010234	5.64610605219617e-05
FGD3	0.635012041659011	0.491933516120191	0.819704858152874	0.000489836818096799
CIITA	0.639693031580116	0.513840530648874	0.7963699829895	6.41474033976458e-05
SIT1	0.683887093203525	0.576012229799768	0.811964628620729	1.43653687051181e-05
CCL14	0.629875617744744	0.341120707430385	1.16305836962504	0.139615995146804
RRAD	0.979660214786286	0.75585220959707	1.2697378194432	0.876591933536077
TNFSF14	0.376786030654697	0.185943357991871	0.763499779877747	0.00675192547709014
COL4A4	0.419541278420677	0.22726396747651	0.774495342368996	0.00548707204857664
NPY1R	0.950166368232106	0.740154371128578	1.21976733845777	0.688335541967778
ELMO1	0.700372500513154	0.534597421137814	0.917553321583637	0.00975641465862472
DENND1C	0.621353856212241	0.487014270351741	0.792750106379797	0.000128911207167885
CYP1B1	0.82249094170407	0.673908454283657	1.00383270885708	0.0545638038585134
RGS18	0.39197223428602	0.235264269896662	0.653062330793623	0.000323292506665257
RIMS4	0.969106798407511	0.738862109416206	1.27110048647875	0.82063085275372
CD300A	0.677125215099894	0.551892578149733	0.830775000564842	0.00018636941634607
KCNJ5	0.90535963465833	0.660510100725977	1.2409743123803	0.536579737157022
C1R	0.811336482118216	0.716607740990419	0.918587463632719	0.000965036575774877
TMEM37	0.773122723186767	0.588335225748285	1.01594927338832	0.0648311537417826
ARL11	0.31903069223699	0.178981840242855	0.568664298294787	0.000107053836671547
P2RY12	0.703786117966339	0.493453021879034	1.00377316153827	0.0524801289121152
ACE	0.717755050623129	0.520573869967852	0.989623840948501	0.0430102112940259
DNAJC5B	0.403486456633936	0.235483089829516	0.69135036747171	0.000955238125145391
ROBO2	1.2407512239055	0.995461889668009	1.54648170422316	0.0549222102482787
VCAM1	0.76206285049356	0.639307966666001	0.908388160921778	0.00242825336673815
MNDA	0.667592699466699	0.551163588960906	0.80861657284267	3.58864423617856e-05
GPR18	0.622689556482941	0.442112387858089	0.877021984458352	0.00670954026737708
ARRDC5	0.120357515542649	0.0403491404858927	0.359014625173089	0.000146413774143448
SLC2A5	0.602569639770454	0.463949820170222	0.782606555682849	0.000146038115669884
MSR1	0.730459089141803	0.592491096913931	0.900554428056464	0.00327516558121189
PSMB9	0.7345364035697	0.642433914952306	0.839843158356864	6.38095105219377e-06
RASSF5	0.665888352358273	0.536995317472528	0.825719114076073	0.00021170065926982
CHGA	1.40908318020819	0.949089339000008	2.09202161183016	0.0889773557229951
C1QC	0.805006450320031	0.731487566153939	0.885914422939733	9.03662613425357e-06
CXCL16	0.715251707416966	0.600335534737148	0.852165123270403	0.000176722325030045
RASGRP2	0.728352436432529	0.552889324898886	0.959499935641224	0.02419924327257
FAM107B	0.819135158998815	0.670899706127157	1.0001232711538	0.0501416286536489
CEBPA	0.842008632448905	0.674785044259972	1.05067316347534	0.127918114663856
SERPINE1	0.917870020484214	0.802005796366433	1.05047292466046	0.213219843135406
HLA-DMB	0.731209984320639	0.635803897786245	0.840932311097505	1.14069892781321e-05
CLEC12A	0.53411133008492	0.353834326556312	0.806238658926952	0.00283480494133762
PARP15	0.545915476343103	0.361364554972284	0.824717596704456	0.0040343761177687
P2RY6	0.461353495537557	0.32413674139323	0.656658195951026	1.74517403357406e-05
ONECUT1	1.5555374528794	1.07088862597812	2.25952233370716	0.0203666126656318
NCF4	0.65976760029578	0.549214354754329	0.792574488688966	8.81648500094693e-06
LILRA2	0.390580313335379	0.199644625739875	0.764122653438868	0.00603874687754902
PTPN7	0.656204226878584	0.54023567990559	0.797066916144027	2.17646277189725e-05
EBI3	0.614237801123545	0.503245858066911	0.749709253004768	1.64416748059692e-06
ADAM28	0.48569662480964	0.311099248506698	0.758282806801436	0.00148618148447775
PLA2G5	0.647317923248276	0.469999941168694	0.891533077039398	0.00774592773656704
APOBEC3G	0.628870335947	0.516477544282946	0.765721382878622	3.8900184029078e-06
BASP1	0.879192510133194	0.749950284272245	1.03070761633807	0.112484286869634
ASGR2	0.211184674509247	0.0785276281654459	0.567939816717924	0.00206440884826189
OLR1	0.827368718085588	0.667977185267113	1.02479397614883	0.0826259460940581
PLA2G2D	0.746652663829535	0.655929822275902	0.849923545890013	9.86339684437866e-06
TNFSF10	0.746798232460969	0.634468581363637	0.879015315160555	0.000447321561442159
TIMD4	0.508661258448237	0.351797037431844	0.735470309059299	0.000326744771261385
ZBED2	0.632573266752075	0.479791620569377	0.834005682163702	0.00116673771241753
BANK1	0.828163127501893	0.648247149150675	1.05801339296643	0.131371791948952
ITK	0.600479874086409	0.453068619435211	0.795853130663338	0.000387057315660004
ART4	0.765553111280094	0.38231698865173	1.53294670021717	0.450781165715477
BTLA	0.465027223019122	0.291054741252281	0.742988474327701	0.00136217506278162
SLCO2B1	0.75272043069229	0.626612348473517	0.904208236817939	0.00239515993802688
GZMK	0.742530542468218	0.644894054562954	0.854949123188611	3.49293316643072e-05
MRC1	0.709272107736577	0.583822037323682	0.861678543549353	0.000542094019988429
ICAM2	0.718668511483825	0.543119040161056	0.950959902354407	0.0207858907786086
NTRK1	1.61955446406541	0.797472432166901	3.28908756751263	0.182243491054485
CD3G	0.610435818636326	0.479691730953264	0.776815326655082	5.97920545900935e-05
LRMP	0.618761109862438	0.447790475720735	0.855009947368711	0.00362226143463226
CD209	0.69814338461276	0.557825937999883	0.873756762236937	0.00169643278864156
GIMAP4	0.734246001484218	0.63792004021567	0.845117188218913	1.66784618472357e-05
TNF	0.508858572865031	0.320663110721555	0.80750494372607	0.00413810532124022
P2RY10	0.61525254099408	0.469969033521894	0.805448151260028	0.000408981785490613
MATN4	1.21891181856937	0.737915304343777	2.01343706073334	0.439481524426949
NCF2	0.724342045776143	0.602428590608198	0.870927123079387	0.000604288690593657
ITGAD	0.559347325568061	0.286583373505384	1.09172219865108	0.0886120391152607
CD79A	0.817519099116759	0.735449916349435	0.908746418434739	0.000189392697103946
STK17B	0.855330025852737	0.705871961149573	1.03643364999764	0.110765736981913
IL15RA	0.581671953256711	0.441656125358407	0.766076233927267	0.000114988048244018
CD37	0.747481562609577	0.633315893425785	0.88222748274788	0.000577934572584211
ONECUT2	1.8762967531008	1.09501886086652	3.21500353236908	0.0220024575778898
BLK	0.82576848384174	0.623080006652773	1.09439170190914	0.182774683103435
ANKRD22	0.706814844101415	0.59316486155845	0.842240085714988	0.000104625135709249
GPBAR1	0.276262705733325	0.13409732367418	0.569146948559073	0.000486082786178421
STAT4	0.413167684917791	0.282084276144483	0.605165017325855	5.6439586265393e-06
CAMK1D	0.753574000736855	0.522748100192384	1.08632393762418	0.129459984651123
GPR132	0.529261219645623	0.377190474555907	0.742641868012638	0.000231781664042383
LILRB3	0.388274613769464	0.240283570116584	0.627413583145446	0.000111638390747576
KCNA3	0.414310182300562	0.26106900114269	0.657500225636156	0.000184403492699494
SLC15A3	0.759204053451476	0.643699406563046	0.895434715179743	0.00106942206957199
BTG2	0.684608006675909	0.567520393874389	0.825852476604563	7.51649705042078e-05
LTA	0.561626730971735	0.390389838322711	0.807973348633261	0.00187685195049434
CRIP1	0.443768904672569	0.29287951395781	0.67239540961086	0.000127085853769331
GBP2	0.702868709848447	0.616387105527999	0.801484033091246	1.41436149990104e-07
MAFB	0.79786518655437	0.659136710613288	0.965791839030072	0.0204970588546263
LCP1	0.776961536503629	0.693412178139542	0.870577772120693	1.37552369488427e-05
DERL3	0.739627474594354	0.620341181468822	0.881851499653043	0.000776298682249189
CD8A	0.757673489785093	0.670424124848461	0.856277535139239	8.76077475299442e-06
HLA-DPB1	0.747024876746518	0.662377696727136	0.842489367071845	2.00182293449141e-06
GLRA2	1.8612152083352	1.30363474954454	2.65727961988473	0.000627395331282963
CD163	0.78990297620165	0.686939144847564	0.908299834842987	0.000933943545668223
CD5	0.69744494707622	0.578060755279876	0.841484999213689	0.000168768627308084
CLEC4C	0.376211942265771	0.136751076092813	1.03498582641737	0.0583095024590687
PIK3AP1	0.700120143992356	0.577131957849778	0.849317403683724	0.000298049608331886
PTPN6	0.719790426832582	0.615164669360244	0.842210686609554	4.08185972972237e-05
C1orf162	0.66416015216492	0.547190793751467	0.806133277023079	3.46874527285822e-05
HS3ST2	1.14037839266061	0.979941677684516	1.32708191524218	0.0894998316896407
DYSF	0.87404172656349	0.689037746562486	1.10871856235064	0.26723318776192
MMRN1	0.855611111307714	0.644524917817087	1.13582943584654	0.280663160600665
UBASH3A	0.534548637032589	0.394307077029809	0.724669330070881	5.47798123861597e-05
SLA	0.596886950454883	0.484274363354107	0.73568633523311	1.31515048273919e-06
OSM	0.732583913752365	0.540793059164242	0.992392897050367	0.0445084240162659
CD300LF	0.611278389907345	0.470442965641371	0.794275389915312	0.000229801580714936
TNFAIP2	0.764852552592931	0.643934450629714	0.908476672797737	0.00226421676620095
P2RX5	0.698206099820477	0.480385429688197	1.01479297184958	0.0597012850766915
IL2RB	0.773268696581187	0.667070509981472	0.896373723864628	0.000646398512429204
RCSD1	0.681745546073243	0.550208712704942	0.844728516394737	0.0004603642881544
HLA-DQB2	0.851337493353417	0.756936464438131	0.957511708895245	0.00727453570342791
TNNI2	0.854703037090435	0.58251318609016	1.25407853256483	0.422208933702982
CTSW	0.723079436974321	0.623215873976512	0.838945049391997	1.90476953175944e-05
HLA-DQA1	0.766773531137654	0.688545492452949	0.853889328298062	1.31903405068909e-06
XCR1	0.487475488936492	0.283150101445579	0.839245160431433	0.00953550957496211
C4B	0.434376827777194	0.276175781136443	0.683199764053753	0.000307702725242387
PSTPIP1	0.558211450053593	0.431969871297604	0.721346657892859	8.31166185507122e-06
AMPD3	0.700013063600065	0.490680089064231	0.998651260020058	0.049136076725503
SLC9A9	0.669967463681601	0.49747959986362	0.902260921885053	0.00836023589020173
FGL2	0.762229529368167	0.668601019566213	0.868969442819223	4.90078429951716e-05
F13A1	0.904629068134396	0.785174583165319	1.0422570578057	0.16539365707441
CCL3	0.694048561018313	0.577879849953826	0.833570170494922	9.31613768254585e-05
CHRNA1	0.950981521296178	0.79346382076652	1.1397694893929	0.58644944910654
MS4A4A	0.694467595166751	0.568480289187649	0.848376363982417	0.000357093584657385
ZNF683	0.495213065378015	0.336970005814481	0.72776797901741	0.000346614906699999
TNFRSF8	0.559835401254512	0.326182844355737	0.960858861589874	0.0353056995561377
ADH1B	0.903621402642866	0.698501089879751	1.16897690088763	0.440430893233662
PTGER2	0.379950841420944	0.233495645534152	0.618266955541012	9.79561727688945e-05
NUAK2	0.740103172665728	0.551471494450747	0.993256608368171	0.0449586873093909
GMFG	0.746322048820565	0.640226633801442	0.86999910836023	0.00018397795609649
CCDC69	0.680380638136945	0.554621145694515	0.834655902223047	0.000221368601369097
ZAP70	0.691766294972899	0.568080790136227	0.842381251345918	0.000245810598908268
CLDN5	0.906746128386769	0.71942465585022	1.14284176203654	0.407038803349888
NCF1	0.564738543841832	0.443224931073526	0.719566072531434	3.79566403644829e-06
CD300LB	0.525749007771842	0.255582461796607	1.08149838306607	0.080625749445094
SH2D3C	0.737031271374232	0.570034606233634	0.952951082343366	0.019934161594128
SIGLEC9	0.541325307634232	0.39216658875126	0.747215844211446	0.000190085041544053
SIRPB1	0.476346943243148	0.301546755703511	0.752475050868037	0.001477620062055
DAPP1	0.532821804976598	0.376058085917165	0.754934108559641	0.00039821102917999
ADAMDEC1	0.777753738075954	0.672288186204112	0.899764252152821	0.000723328831213605
CCL22	0.661274926322833	0.484326172254856	0.902871976022732	0.00924034561705283
C5AR1	0.763146612116002	0.613626615840825	0.949099560790896	0.0151191065380887
EPHB2	0.745829553594151	0.463487987652617	1.20016427142307	0.226958495828057
TNFRSF9	0.560158234253417	0.421351404635056	0.744692539173274	6.63589106226945e-05
DIO3	0.94984630821349	0.458992187381723	1.96562824821345	0.88971092036738
MFNG	0.671249861268685	0.539383768065928	0.83535397787157	0.000354129779704707
LMO2	0.647835623192682	0.488233803182095	0.859610686400833	0.00262772336746413
NGEF	1.04264796247049	0.815023404584248	1.33384485344738	0.739635233915358
SH2D1A	0.619633095739242	0.502395705934098	0.764228612626241	7.72527281585539e-06
MYO1F	0.596960744625559	0.476859239744003	0.747310948227009	6.75022264685607e-06
MAP4K1	0.742171749221295	0.610839724548585	0.901740478239616	0.00269192179840884
CD8B	0.689568001661459	0.585020008150972	0.812799600509847	9.39105019184808e-06
RNASET2	0.566587171037377	0.430766682694702	0.745231781566671	4.8461323312173e-05
TNFSF13B	0.737427776151331	0.638481153399683	0.851708342750542	3.42035611530779e-05
GIMAP6	0.652197423065794	0.531269382036798	0.80065121958073	4.41137200986521e-05
VAV1	0.642427589981432	0.526051593643752	0.784548917551317	1.42754007725984e-05
LRRC25	0.632048823338234	0.511336952861052	0.781257276338096	2.20751859877592e-05
CORO1A	0.764043457385499	0.676749896041207	0.862596962612673	1.37517018203506e-05
ABCC3	0.812999380248683	0.596693852108605	1.10771711481357	0.189601446399692
FOXR2	1.05787543237928	0.7322519272445	1.52829974055908	0.764374814941345
LYN	0.679650901615899	0.54937245921018	0.840823634900454	0.000375435999882598
TNFSF8	0.500524336361481	0.331352674409704	0.756066362634327	0.00100660352355813
P2RY13	0.564152261327999	0.424426508476244	0.749877228696493	8.06759834135867e-05
SELP	0.851018042452848	0.670568394211868	1.08002660851841	0.184576724799299
DPP10	1.58590158163722	1.12372582631365	2.23816501120214	0.00870024757134099
RSAD2	0.690068812999866	0.54393378643199	0.875464952818451	0.00224756110123764
CD53	0.773592649338493	0.688399182142367	0.869329311589428	1.61579547470618e-05
KLRD1	0.201658695314218	0.0964145997584148	0.421784973414086	2.11075092279157e-05
HLA-DOB	0.653577950203878	0.521704837502744	0.818785079773113	0.000216625110005872
CD300C	0.542947187042701	0.401962252452065	0.733381421064499	6.84996026959862e-05
SPIC	0.363679432413591	0.113559310079195	1.16470177098146	0.088525218249946
GBP1	0.772209150163771	0.691952684097798	0.86177420118566	3.89486082918112e-06
RAC2	0.8235281078438	0.734282177779596	0.923621143113675	0.000907973751341264
CTSS	0.736320753947557	0.642405898302589	0.84396524709137	1.0985559493713e-05
CXCR4	0.785478591731902	0.679892430425083	0.907462107915197	0.00104418583010259
CD48	0.716979948813188	0.618130839016207	0.83163662861138	1.10408018620688e-05
CCR1	0.697670834290387	0.582597909833749	0.835472604353049	9.05641485263997e-05
HLA-DQB1	0.752740968568571	0.67638289070563	0.837719246816594	1.94385604339479e-07
NCR3	0.614901590047114	0.430986517497812	0.877298825117862	0.00732000088041388
TRAF3IP3	0.589374175552149	0.443971594849646	0.78239671825269	0.000254515340217478
HES7	0.997728036988973	0.463820205580432	2.14622222968517	0.995356331343607
TNIP3	0.146881889898411	0.0548744535175976	0.393157256194093	0.000134355847377172
ITGAL	0.719403274020114	0.621091567482263	0.833276601659286	1.11943742961238e-05
PYHIN1	0.579765051270451	0.461781794721461	0.727892520919702	2.65552698919108e-06
CSF1	0.642492666371918	0.532738569281067	0.774858157724092	3.67792915817123e-06
POU2F2	0.598999031063437	0.437016471899399	0.821021316783529	0.0014431584811547
TREM2	0.835743372667269	0.721232579052545	0.968435155653688	0.0170067571028357
EVI2A	0.728289137871053	0.608033309231682	0.872328966666626	0.000574502606006775
HCST	0.699478185561288	0.607180072853438	0.805806636203974	7.40490113875731e-07
SIGLEC10	0.646899016266338	0.530318167240807	0.789108054554603	1.73826492444855e-05
LCK	0.713290957953173	0.609851533675222	0.834275167976717	2.37200847028997e-05
PTPRC	0.737912676630842	0.641160314631118	0.849265161780596	2.2510836987955e-05
TNFRSF13B	0.688896422881112	0.451879739996193	1.05023137674283	0.0832449106732291
ELSPBP1	1.77862741641362	1.4956176740803	2.11518995879981	7.39220231047607e-11
STAB1	0.755674148117147	0.615003123210743	0.928521167748438	0.00768443229639146
PIM2	0.702170568472961	0.592301210080689	0.832420226125276	4.64864147643637e-05
FCN1	0.5449642633228	0.421630213235075	0.704375632904138	3.53823855641051e-06
CD80	0.133347504426748	0.060047675931259	0.29612398250346	7.4346665952715e-07
PHYHIPL	1.21352043354834	0.803036906790436	1.83382834610322	0.358264997208017
CD40LG	0.665493299051491	0.465431791740409	0.951549376174654	0.0256022027656649
ITGB7	0.605487377151716	0.45558479813458	0.804712899533065	0.000546181072340949
CD38	0.605594681190198	0.496369565622296	0.73885456177409	7.71386939073852e-07
C1QA	0.786293177652734	0.712999281470236	0.867121436571943	1.4659085934619e-06
CLEC4A	0.520480446527617	0.382876364650302	0.707538830361109	3.06763045838342e-05
DPT	0.910309842820716	0.801667921263135	1.03367490198511	0.147284694059664
ABI3BP	0.823338398507853	0.648212839520654	1.04577706137195	0.111131697822542
DOK2	0.676203304622279	0.568702703424079	0.80402450424281	9.45715888419214e-06
FMNL1	0.707412332222682	0.581937042010682	0.859942178713464	0.000511573194667331
FLI1	0.614641645221097	0.459089578456032	0.822898993504986	0.00107835774479924
AOAH	0.671020306415542	0.554662867567879	0.811787263849791	4.02597230419168e-05
ICOS	0.588752018361023	0.435720328056264	0.795530795339478	0.000561789183742466
EGFL6	0.79632648737932	0.564421346481906	1.12351504501826	0.19469524096122
PDCD1	0.69150436732555	0.5833057942446	0.819772912850224	2.14715704135404e-05
MPEG1	0.766261024446001	0.661548035193098	0.887548486805876	0.000383562118065945
DPEP2	0.561445784572705	0.375649146899285	0.839137720972847	0.00487263121351387
CD1D	0.3465437374991	0.226869913496306	0.529345474457548	9.43890522391775e-07
ST8SIA4	0.612289677757148	0.446577091882309	0.839493687210343	0.00231511660508631
TNFRSF1B	0.726734957863799	0.623667490316266	0.846835384530741	4.30587026930031e-05
ZIC2	1.0553947696137	0.770369394203821	1.44587535292614	0.737114201339728
TRIM22	0.646982135338067	0.544193030766453	0.769186409566949	8.10751776661812e-07
HLA-DPA1	0.811067327680611	0.733880724066333	0.896372105791279	4.05961792160095e-05
DOCK2	0.677283064804314	0.545030125700326	0.841627514224668	0.000438963888929785
AMPD1	0.159983571543203	0.0515881691291017	0.496135908596934	0.00150477719300298
SIRPG	0.651411193689905	0.543593502540461	0.780613714625705	3.43689616913927e-06
VEGFC	0.90691716378232	0.673542266981049	1.22115386410651	0.519779461286193
SPN	0.659460736029766	0.533087298029348	0.815792205090167	0.000125204392160402
RARRES3	0.718468581449224	0.641837023175863	0.804249496196828	9.16093229837789e-09
SUCNR1	0.527180753847873	0.335295738369385	0.828878853573247	0.00555704490386663
RGS16	0.85466172042975	0.706607011296859	1.03373819490883	0.105642726873443
ZBP1	0.411913843162338	0.277446770325485	0.611551592363885	1.08810125145786e-05
FCRL2	0.536879950250204	0.313207578752502	0.920284503104026	0.0236917622712313
TNFRSF4	0.64911532120438	0.518978594605566	0.8118845451468	0.000153423830010916
SPI1	0.730411770485606	0.634940802072438	0.840237944580939	1.10483714388005e-05
TNFRSF17	0.695307144695893	0.566982757423137	0.852675004902059	0.000481185358064796
PRDM1	0.596530753654962	0.459887707975015	0.773773540551967	9.9314774397666e-05
CYBB	0.74405593280392	0.652754681833701	0.848127553195788	9.59527506028906e-06
CLU	0.880426362701012	0.788779051259823	0.982722067606737	0.023162955809048
C3AR1	0.717680398237891	0.601399760111087	0.85644389668489	0.000234856513932991
SUSD3	0.702915288532494	0.571349542993781	0.864776928434678	0.00085603434381537
IGSF9	3.80445074648539	2.293390425965	6.31111271703466	2.28945840998782e-07
MMP19	0.744672068302811	0.545299221702182	1.01693981440019	0.0636950921453172
IL7R	0.755636765981813	0.634976077991512	0.899225879358382	0.00159599830481221
CD96	0.626468977912835	0.494781250826808	0.793205845272679	0.000102699936928674
HCLS1	0.700171904324942	0.603002134676644	0.812999933854139	2.92807964259489e-06
ALOX5	0.688734676628742	0.566521015116837	0.837313077773591	0.000182936046935514
GIMAP2	0.547358294143715	0.4392536338661	0.682068579674509	7.94687407176047e-08
CCR2	0.568605202214207	0.431147113885593	0.749887603494086	6.37432968335712e-05
GBP4	0.741549546157534	0.661092663877204	0.831798262865894	3.34524080428853e-07
SDS	0.939636416458511	0.752723497727926	1.17296271180593	0.582181679755651
HLA-B	0.811443775270519	0.73427567991171	0.896721787795619	4.16738724916201e-05
PRKCQ	0.588558062596639	0.432969331776666	0.800058035579735	0.000714212931221813
SALL3	1.69483221228532	1.08365685795055	2.65070645446976	0.0207751441249446
EFEMP1	0.900547403600879	0.767904008193786	1.05610286895081	0.197563289384198
MS4A7	0.751446319776673	0.619113591248995	0.912064570197436	0.00383690495318585
ZBTB32	0.386696463261332	0.204201175565164	0.73228841256648	0.00354149668747106
ITGB2	0.754254451363989	0.667115663647363	0.852775325783854	6.71474909838435e-06
PDCD1LG2	0.61290800668146	0.46697662082906	0.804443323066813	0.000418173877484329
SELPLG	0.732479734442946	0.631464425560981	0.849654453444418	3.92489055097752e-05
CLEC4G	0.741908569444829	0.46792827057669	1.17630919101619	0.204278182761873
SIGLEC11	0.278952652184123	0.145421515810169	0.535096761487031	0.000122332494786665
TREML2	0.646578494715677	0.363778970660372	1.14922462139545	0.137282308194679
FCGR1B	0.236933339572297	0.125804697277322	0.446226640306861	8.26223330208295e-06
HAMP	0.581291559505792	0.411419936384321	0.821301661077096	0.0020958734192145
B3GNT4	2.75242550437144	1.65254826288846	4.58434184782761	0.000100332339371819
APOL1	0.758413774596873	0.676176811720563	0.850652438131789	2.33376010672495e-06
VNN1	0.566557583273428	0.337229161509006	0.951837894825876	0.0318381780061422
TNFRSF25	0.546919112495775	0.368677640141331	0.811333487700799	0.00270848327982464
CXCL13	0.800547963502501	0.724680894424734	0.884357579727202	1.19137211773118e-05
IL4I1	0.704360214421569	0.610705112122062	0.812377859317539	1.47633859796146e-06
ADRA2A	0.836347277830155	0.671637817756442	1.04144935058967	0.11025934092038
SPIB	0.786109413029934	0.612746872208826	1.00852087098645	0.0583291428568842
ITM2A	0.727916662864088	0.617931610030417	0.857477849448596	0.000144874863267264
COL8A1	0.980455276214848	0.828180189926803	1.16072874037532	0.818711450661198
PTGDR	0.15605411308543	0.0375762290629445	0.648092871961321	0.0105579307626732
PRF1	0.746462174189546	0.658121864418649	0.846660485878237	5.36069371782928e-06
ITGAM	0.641627289887502	0.511517954349573	0.804831141561519	0.000124167321381101
LILRB2	0.613548588261232	0.50124825314223	0.751008842020911	2.17902695390834e-06
MMP9	0.88178294223046	0.801966750358278	0.969542885489008	0.00935191804835564
CXCL11	0.699181982232565	0.599417177299389	0.815551276793811	5.22162468239366e-06
CCL25	0.0930191243622023	0.0233578866966677	0.370434089756298	0.000755811201415949
TNFAIP8	0.600596675284493	0.43962594624009	0.820507455139581	0.00136128628184702
MAP7D2	1.18230990619231	0.965456965165532	1.44787055737983	0.10524848016143
DRD2	1.14791439877746	0.840405869685957	1.56794177010332	0.385897669321701
DEF6	0.674111366155753	0.558017051267539	0.814358867615506	4.32382541207285e-05
CD4	0.725536290175292	0.627255898165322	0.83921555763926	1.55840079720233e-05
PRDM8	0.505210248712684	0.293754332189274	0.868880446807763	0.0135870586556275
CMKLR1	0.740906171895237	0.601619945352874	0.912439755019222	0.0047667702953304
TMC8	0.704293811185847	0.581123454269487	0.853570388237435	0.000351249412610996
SRGN	0.678029426743737	0.592949928976676	0.775316567326082	1.34729684179588e-08
CASP5	0.134198580107642	0.0517231599356182	0.348185588918465	3.64661890335903e-05
DNASE1L3	0.805387967666725	0.635166732284813	1.02122756985244	0.0740068511096047
CX3CR1	0.778489757819616	0.553257154313676	1.09541521208497	0.150725415220357
CCL19	0.897753851824592	0.825309263312714	0.976557533391586	0.0119861448553178
CETP	0.899206409253234	0.774112063532779	1.04451565158674	0.164497603887956
GP1BA	0.888411299565839	0.720343527505947	1.09569199563572	0.26879181651881
IL12RB1	0.575345942061741	0.454573579620663	0.728205438871188	4.25752918710219e-06
LAG3	0.728336429427065	0.637215150045271	0.832487982109149	3.34421685309546e-06
CABP7	1.32396200722268	0.973757433368741	1.80011503532762	0.0734040959887507
ABI3	0.673058639938176	0.557018274761048	0.813273016921681	4.11893543020861e-05
SLC7A7	0.616099996992431	0.496613505401746	0.764335246958306	1.06704420440339e-05
EEF1A2	1.11140302612283	0.987440940093041	1.25092715556091	0.0800314868041556
TMEM176B	0.734256225922466	0.639561671241036	0.84297141237333	1.16107063216787e-05
LTB	0.785911957467711	0.688183366965121	0.897518938323939	0.000376796187592238
GBP3	0.691108567220676	0.581082049483394	0.821968347000996	2.96785438206699e-05
TLR2	0.616238932418435	0.484383973920093	0.783986346110738	8.10919574481198e-05
ABCD2	0.134892970596479	0.0487904920698446	0.372943840990462	0.000112962589625574
GNGT2	0.440638135047826	0.301715476945032	0.643526702787604	2.22480487539556e-05
RNASE2	0.622106529130254	0.455984395128	0.848749513627221	0.00274792605155386
TLR7	0.625583006758935	0.453732128151312	0.862522343172135	0.00420340021260516
FAM49A	0.676242362692054	0.502807178573361	0.909501201627354	0.00967195951099658
CXCL12	0.832662376697138	0.724487138645428	0.956989567631577	0.009905009220934
IRF8	0.746984975459006	0.632441977806455	0.88227311459748	0.000593038565172288
PSD4	0.634416846691213	0.47604568064746	0.845475028401079	0.00189949270528405
MYO1G	0.610019615164481	0.468271402781148	0.794675755716258	0.000248965725087815
PRAM1	0.425258253139131	0.256721201731764	0.704439604687975	0.000898512591905475
CD7	0.71835529293497	0.622697994250829	0.828707225094774	5.7080650648314e-06
GCH1	0.590848765406373	0.471569690585853	0.740298349430662	4.79333871894126e-06
CD1C	0.740040854359788	0.568222104109645	0.963814082839492	0.0255230179018028
OSCAR	0.641846475515842	0.503872605480239	0.817601301700982	0.000329694423436203
SPOCK2	0.710016575227677	0.604566634243347	0.83385934410519	2.98137864438161e-05
FPR1	0.6783547978921	0.544147784805365	0.845662234916249	0.000559821803482511
SEMA4A	0.685497924280612	0.532232115600749	0.88289937870928	0.00344962854554163
LAIR1	0.648183736189806	0.528632916500849	0.794771083575346	3.07074062788609e-05
ANPEP	0.953833961851589	0.80186310212203	1.13460667335089	0.59349147750434
CD86	0.621907495716537	0.510090585366871	0.758235780709891	2.64320081145015e-06
LSP1	0.763072104140105	0.661353046310057	0.88043600821916	0.000211829162976189
TCL1A	0.866392487801301	0.724770149372483	1.03568827105868	0.115280747266994
CR1	0.438015219615292	0.246136640058808	0.779474898856152	0.00499805338635822
KRT9	1.37932242261163	1.08173919758615	1.75876990476506	0.00949690346851819
ARHGAP30	0.723416986308302	0.610662669795024	0.856990548079595	0.000180310513431552
IGLL1	0.420063688757614	0.223997972061552	0.787745982647407	0.00685823367474018
SLC25A21	1.20745057882093	0.714308467333215	2.04104664436924	0.481540473982683
LILRB1	0.547925067346827	0.432577033027585	0.694031019922132	6.08833569329727e-07
SLC22A3	0.925224832173293	0.716040014089416	1.19552116254106	0.55229592370056
GIMAP1	0.542979999776005	0.404702798805887	0.728503190555304	4.655945073799e-05
ATP2A3	0.736992299592798	0.616121929384212	0.881574934691813	0.000840570140517189
PTPN22	0.527475138569071	0.38682319046348	0.719269238938581	5.28980289584357e-05
TNFRSF18	0.565064082987964	0.4324904678778	0.738276197044986	2.86113493101501e-05
RSPO3	0.528753788038675	0.320758236783826	0.871623971900278	0.0124639735639526
C7	0.947429112627972	0.846985558608849	1.05978421276668	0.344934372500315
PLCG2	0.701219533753008	0.522452929312163	0.941154325929701	0.0180844511935146
IL10RA	0.682303723081263	0.577123781959812	0.806652550254758	7.62840123481656e-06
SMOC2	0.922476422102907	0.742991790091614	1.1453191821014	0.464821998008572
TLR10	0.740393060279966	0.532715039284449	1.02903399244568	0.0735242173015845
FGD2	0.538600024491549	0.396195854243855	0.732188343908689	7.82729875534171e-05
BIRC3	0.716046729300771	0.597779102549889	0.857713018664016	0.000287433664782389
PTGER4	0.648236158389185	0.499221625091086	0.841730598041499	0.00114277936707765
CD6	0.677456118801589	0.551403009159873	0.83232551378523	0.000209577227389118
FCER1G	0.767991798995412	0.68839620536819	0.856790607973714	2.26007397070527e-06
KIR2DL4	0.415950223507015	0.282763329535111	0.611870671914875	8.40664785813106e-06
RARRES2	0.832194379465914	0.723912493069056	0.956672929180398	0.00980153026941956
INMT	0.882680102826797	0.68628732167964	1.13527401616494	0.331112124038512
AKNA	0.680284976893192	0.542005336850141	0.853843344930987	0.000891135077071294
CD84	0.622482415580057	0.486383581928191	0.796664139382054	0.000165986422291485
RASSF4	0.617991324316241	0.486344207140707	0.785273621691659	8.22858162785655e-05
HLA-DRB1	0.794395636031447	0.724489153202212	0.871047445992158	9.70652009834697e-07
HSH2D	0.606509576750648	0.473465180113753	0.776939640211496	7.57301860394518e-05
TDO2	0.792449507722631	0.585428232861718	1.07267840367065	0.132113774492977
IFNG	0.558815441250934	0.419985579740099	0.743536712793143	6.50719037043062e-05
CD28	0.648268952080577	0.46085982793938	0.911888189757622	0.0127818483277696
G0S2	0.842120395321351	0.712513480935435	0.99530293698464	0.0438858970333459
PARVG	0.545813890787574	0.414253100405253	0.719156484490351	1.68660375573145e-05
ANTXR2	0.824887113363985	0.637947922898426	1.06660547886494	0.142052409550639
APOL4	0.658046139728398	0.520148309049854	0.832502412249393	0.000486923945319656
DOK3	0.771639633339093	0.610315830607695	0.975605897600295	0.0302849768518388
AIM2	0.842939591654096	0.730617196357372	0.972530018073129	0.0191950259263499
CD2	0.766048921328796	0.682730670177981	0.859535063388951	5.72176838798313e-06
CD22	0.967818556460166	0.848093071988638	1.10444571376146	0.627325136190248
FTCD	1.69941933863302	0.888431347519471	3.25070259686733	0.109049863034679
VGF	1.04255698931237	0.980361076451656	1.10869872547175	0.184189088199223
LILRB4	0.686791211713782	0.581301204295	0.811424722677702	1.00573299917936e-05
DNAH5	1.06465968430639	0.778996444466519	1.45507755707876	0.694255249510954
TAGAP	0.635685739870796	0.502892126627919	0.803544813049072	0.000151015133103737
RNASE6	0.674086010442707	0.570624559680756	0.796306330959154	3.49835691347291e-06
CXCR6	0.576238246618853	0.45438236159469	0.730773341863476	5.42932939489593e-06
GIMAP8	0.596384570023428	0.466878761514695	0.761813525653027	3.50366794720962e-05
CACNA1B	1.51612170082949	0.81515397516465	2.81986603974029	0.188700648426031
IL21R	0.539351155703396	0.407867504967061	0.713220998525198	1.48743605251289e-05
FGR	0.657306676719467	0.532782824322674	0.810934676449558	9.01979191938204e-05
TYROBP	0.787014074321037	0.70380616524825	0.880059288711863	2.65777022326488e-05
HTRA4	0.755895159795097	0.515846752942503	1.1076496834426	0.151139782571198
LMO1	1.283632417138	0.861024967182361	1.91366365103159	0.220370461711105
CD19	0.799167325011745	0.662274490965735	0.964356051876792	0.0193577153469665
PDPN	0.901407225143325	0.754851367760224	1.07641718654034	0.251565091198101
CD72	0.558861633276014	0.445296580033961	0.701389454022113	5.15987255409519e-07
SOCS1	0.627698198805634	0.504488838854888	0.780998504700653	2.9528975997369e-05
PTAFR	0.683211096653608	0.557750384150976	0.836893018551962	0.000233201862743022
CD3D	0.757283760846777	0.671545931410221	0.853967938183998	5.76078814809591e-06
P2RY14	0.303631881968797	0.153544699205678	0.600426587338055	0.000611787334422243
PIK3CG	0.604883548855419	0.440821803296929	0.830004561796762	0.00184456845463641
GPR68	0.82934134979596	0.643972713315942	1.06806866231914	0.147123813406162
ALDOB	0.979346989473187	0.552612776915546	1.73561047781705	0.943015575398953
CXCL10	0.807443743541718	0.739441378315435	0.881699913074847	1.89025804783136e-06
CD79B	0.899134409285853	0.792107555608924	1.02062236401765	0.100117800559801
IL3RA	0.608100485378151	0.459579012700938	0.804619423641467	0.000498654408072821
FAM107A	0.705205774117243	0.453563817053738	1.09646132506504	0.120897039557817
AOX1	0.631830893178912	0.425914595609064	0.93730123759761	0.0225038278805847
SP140	0.505167545085671	0.370445775192313	0.688884219223183	1.59716781432072e-05
TREM1	0.829481971353522	0.638669598752337	1.07730247712532	0.161006273927859
DDN	1.71515797007179	1.2617625751378	2.33147417768314	0.000572361547721163
ARHGAP9	0.623204895983305	0.502862679422913	0.772346722614757	1.56239866753021e-05
CD1B	0.369379971092424	0.177575790137034	0.768356784102999	0.00769682304367027
AQP9	0.75411424445308	0.581327081529289	0.978258732056658	0.0335434217808224
PNOC	0.555773379805394	0.375459695851298	0.822682309481881	0.00333170972751814
SEMA4D	0.557326273280244	0.424811555283148	0.731177320921541	2.44095451769253e-05
IL1B	0.753786496051301	0.586599754852185	0.968623114703612	0.027165443778555
FBP1	0.714065688914776	0.607351713025472	0.839529710956705	4.54440208568953e-05
KLHL6	0.772841360178948	0.585327469793968	1.02042668220148	0.0691632025555325
YBX2	1.22388698037069	0.783311613327539	1.91226494697015	0.374903274549254
TMEM156	0.394648058786155	0.247345411361874	0.629674467968266	9.60360160986802e-05
LAT2	0.622406595757912	0.476918599282832	0.812276919007755	0.000482103262080922
PKD2L1	0.651333902794874	0.253247702042228	1.67518145084398	0.373716838804405
DOCK8	0.641245545227198	0.506712399976759	0.811497506855144	0.000216825313368502
CLEC7A	0.542550840809407	0.408229155981714	0.7210690626815	2.51746163612731e-05
TMEM119	0.95303882727195	0.826107888359935	1.09947262226378	0.509525159807942
CFD	0.911057927798941	0.778741584620099	1.06585620210615	0.244669418458214
CAMKV	1.56503390697823	1.02138943199978	2.3980384496401	0.0396702334933039
FCGR1A	0.618130801332961	0.491713751808468	0.777049017139058	3.77573247582715e-05
LCP2	0.715635701940848	0.599391375788046	0.854424135180531	0.000215965414876334
TIFAB	0.265083701939768	0.124974208277164	0.562270967768409	0.000538691993505128
SLC43A2	0.569284777953146	0.414408096717865	0.782043500056914	0.000506204500613646
GFI1	0.515745633988713	0.375305002653595	0.708739710629252	4.45234082674232e-05
VNN2	0.494030057797407	0.353472659929456	0.690479705151789	3.65589846608349e-05
CES1	1.05410137648497	0.835454869733386	1.32996975918291	0.6568802165638
CCL8	0.659301837215687	0.554429145321876	0.784011656356242	2.44247737855483e-06
INSL3	0.222799164609332	0.0967491651528263	0.513073861383767	0.000418754417465269
CXCR3	0.691395043620781	0.587562191219066	0.813577036588377	8.79390434552236e-06
C1QB	0.812378979274641	0.741488104882909	0.89004746215251	8.18563170546292e-06
LGALS2	0.689425562845798	0.565171192418778	0.840997582822752	0.000244638007723958
HSD11B1	0.598844843350178	0.468949299698129	0.764720507393756	3.95312224009429e-05
DGKA	0.718714575096946	0.531628715799364	0.971637959172485	0.0317940193526168
MS4A1	0.864690312550816	0.740166887230925	1.01016318011259	0.0668758308996183
HCK	0.706793728183248	0.59959054805729	0.833164191493296	3.55276037404557e-05
CCR7	0.789936982558041	0.670659540925254	0.930428031415196	0.00475200575352487
EPSTI1	0.692823844736316	0.581099793020845	0.826028309767428	4.31090570052581e-05
PTK2B	0.575185174751887	0.426612624431151	0.775499753893832	0.00028606630901745
FCAMR	0.762818345575001	0.499493318071931	1.16496418929469	0.210137694991044
SLC40A1	0.841939663270672	0.728035347728912	0.973664807347077	0.0203507505265368
LAPTM5	0.803321131570405	0.720960112204113	0.895090906561633	7.24444319134077e-05
FCRL5	0.508816174503595	0.337805301442854	0.766399752551749	0.00122504064645583
INPP5D	0.673106890397233	0.547101950663524	0.828132462972845	0.000181674980609587
CCL3L1	0.661601487824927	0.483910893746174	0.904539522356264	0.00963419716386335
GABRA5	1.88170034230068	1.44967945423052	2.44246834559294	2.03095077009887e-06
GAB3	0.317126692114982	0.194673822135549	0.516604326912354	3.97307620836989e-06
HLA-DRB5	0.798231149678903	0.72310883857307	0.881157765371881	7.86507897105724e-06
PTPRN2	0.815474856331058	0.523432901302456	1.27045747344778	0.367188253092216
